# Supplementary material for: Aliens on the Road: Surveying Wildlife Roadkill to Assess the Risk of Biological Invasion
Source: MDPI journal article supplement (doi:10.3390/biology12060850), 2023-06-13
Supplement: s1 [file s1]

**Supplementary material S3 of the article:**

**Aliens on the road: surveying wildlife road-kills for assessing the risk of biological invasion**

Andrea Viviano, Marcello D'Amico, and Emiliano Mori

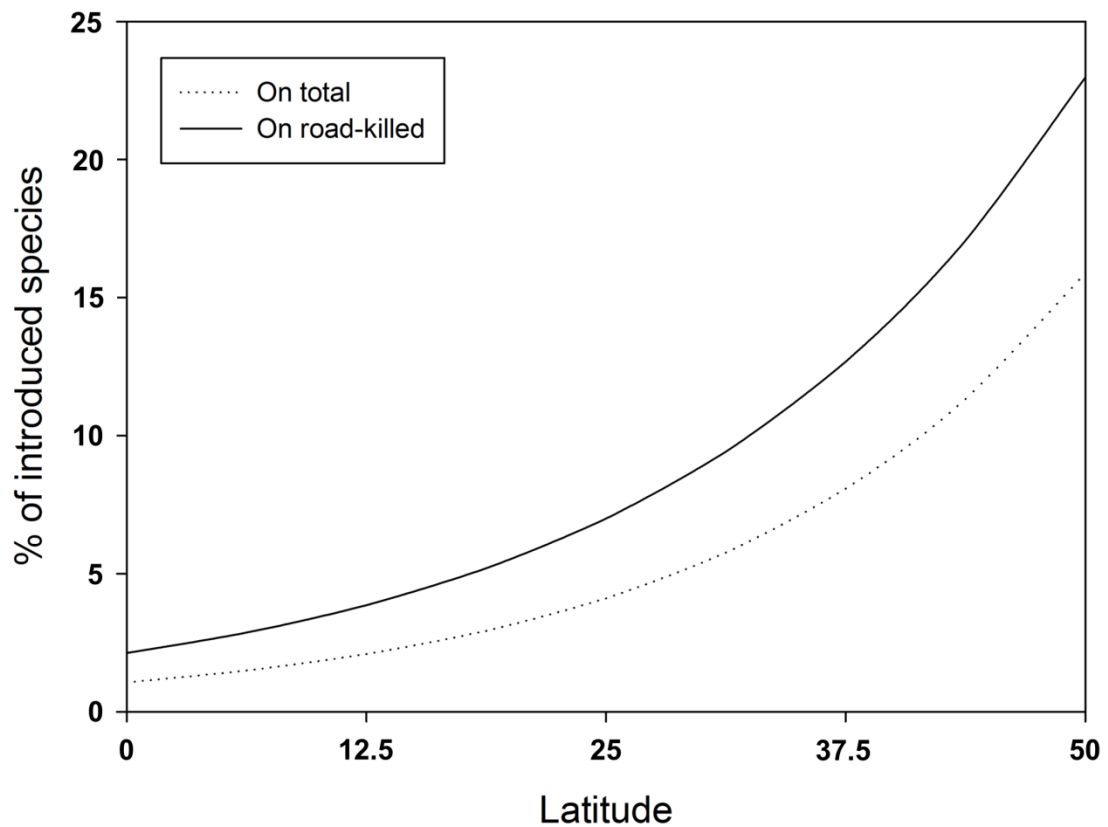

**Figure S3.** Relation between the *percentage of introduced species* (both *on the total of road-killed species* and *on the total of existing species*) and the latitude of the country hosting the study areas.
