# Supplementary material for: Aliens on the Road: Surveying Wildlife Roadkill to Assess the Risk of Biological Invasion
Source: Biology (Basel). 2023 Jun 13;12(6):850. doi: 10.3390/biology12060850 (PMC10294960; doi:10.3390/biology12060850)
Supplement: Supplementary file 1 [file biology-12-00850-s001.zip]

Archive with 4 entries (4 files):
- SupplementaryMaterialS1.xls
- SupplementaryMaterialS2.xls
- SupplementaryMaterialS3.pdf
- SupplementaryMaterialS4.pdf
