# Supplementary material for: Aliens on the Road: Surveying Wildlife Roadkill to Assess the Risk of Biological Invasion
Source: Biology (Basel). 2023 Jun 13;12(6):850. doi: 10.3390/biology12060850 (PMC10294960; doi:10.3390/biology12060850)
Supplement: Supplementary file 1 [file biology-12-00850-s001.zip › SupplementaryMaterialS1.xls]

## Sheet: Road-kills
Species		Native/Introduced	N	Year	Month	Day	Latitude	Longitude	Location	Age	Sex	Speed limit	Presence of autovelox	Habitat type
Red-legged partridge	Alectoris rufa	Native	1	2011	June	22	43.0749	10.9991	Braccio di Tatti	Adult	M	70	No	Ecotone (hedgerows)
Red-legged partridge	Alectoris rufa	Native	1	2012	April	21	43.0795	11.0192	Il Gabellino	Adult	M	50	Yes	Open
Red-legged partridge	Alectoris rufa	Native	1	2013	August	16	43.0755	11.0006	Ricavolo	Juvenile	-	70	No	Closed
Red-legged partridge	Alectoris rufa	Native	1	2013	September	4	43.0803	11.0194	Il Gabellino	Adult	M	50	Yes	Open
Slow worm	Anguis veronensis	Native	1	2012	June	23	43.0859	10.982	Fonte Vecchia	Juvenile	?	70	No	Closed
Yellow-throated wood mouse	Apodemus flavicollis	Native	1	2012	July	20	43.2165	11.1552	Montebello	Adult	F	90	No	Open
Wood mouse	Apodemus sp.	Native	1	2013	January	10	43.0578	11.0249	I Canapai	Adult	?	90	No	Ecotone
Common swift	Apus apus	Native	1	2011	May	11	43.083	10.9845	Via Fratti - Prata	Adult	?	50	No	Urban
Common swift	Apus apus	Native	1	2011	May	18	43.083	10.9845	Via Fratti - Prata	Adult	?	50	No	Urban
Common swift	Apus apus	Native	1	2011	May	23	43.083	10.9845	Via Fratti - Prata	Adult	?	50	No	Urban
Common swift	Apus apus	Native	1	2012	June	30	43.0826	10.9836	Via Basilicata - Prata	Adult	?	50	No	Urban
Common swift	Apus apus	Native	1	2013	April	9	42.7589	11.1156	Porta Corsica	Adult	-	50	No	Urban
Common swift	Apus apus	Native	1	2013	August	9	43.0828	10.9836	Via Basilicata - Prata	Adult	-	50	No	Urban
Common swift	Apus apus	Native	1	2013	August	2	43.083	10.9845	Via Fratti - Prata	Juvenile	-	50	No	Urban
Common swift	Apus apus	Native	1	2013	July	17	43.0828	10.9836	Via Basilicata - Prata	Adult	-	50	No	Urban
Common swift	Apus apus	Native	1	2013	July	17	43.083	10.9845	Via Fratti - Prata	Adult	-	50	No	Urban
Long-eared owl	Asio otus	Native	1	2013	June	5	43.0833	11.0255	Sbarra di Forcoli	Adult	-	70	No	Closed
Little owl	Athene noctua	Native	1	2011	May	18	42.8449	11.0813	Braccagni	Adult	?	50	Yes	Urban
Little owl	Athene noctua	Native	1	2013	August	23	43.2995	11.3269	Siena Sud	-	-	50	No	Urban
Little owl	Athene noctua	Native	1	2013	October	2	43.2214	11.1636	Pentolina	Adult	-	90	No	Closed
Little owl	Athene noctua	Native	1	2013	October	2	43.2995	11.3269	Siena Sud	Adult	-	50	No	Urban
Cattle egret	Bubulcus ibis	Native	1	2011	November	17	42.8449	11.0813	Braccagni	Adult	?	50	Yes	Urban
Cattle egret	Bubulcus ibis	Native	1	2011	September	28	42.8853	11.0733	Ponte del Madonnino	Juvenile	?	70	Yes	Open/Anthropized
Common toad	Bufo bufo	Native	12	2011	March	10	43.0795	11.0192	Il Gabellino	Adult	F	50	Yes	Open
Common toad	Bufo bufo	Native	12	2011	September	14	43.0795	11.0192	Il Gabellino	Adult	8 M and 4 F	50	Yes	Open
Common toad	Bufo bufo	Native	7	2011	September	21	43.0795	11.0192	Il Gabellino	Adult	4 M and 3 F	50	Yes	Open
Common toad	Bufo bufo	Native	2	2011	September	21	43.0683	11.0188	Le Fornaci	Adult	F	50	No	Ecotone
Common toad	Bufo bufo	Native	1	2012	August	23	43.0948	10.9878	Font'Aquila	Adult	F	70	No	Closed
Common toad	Bufo bufo	Native	5	2012	March	1	43.0803	11.0194	Il Gabellino	Adult	F	50	Yes	Open
Common toad	Bufo bufo	Native	26	2012	March	1	43.0803	11.0194	Il Gabellino	Adult	16 F and 10 M	50	Yes	Open
Common toad	Bufo bufo	Native	32	2012	March	1	43.0803	11.0194	Il Gabellino	Adult	24 F and 8 M	50	Yes	Open
Common toad	Bufo bufo	Native	9	2012	March	1	43.0683	11.0188	Le Fornaci	Adult	8 F and 1 Mo	50	No	Ecotone
Common toad	Bufo bufo	Native	2	2012	March	15	43.0683	11.0188	Le Fornaci	Adult	F	50	No	Ecotone
Common toad	Bufo bufo	Native	1	2012	November	6	43.083	10.9845	Via Fratti - Prata	Adult	F	50	No	Urban
Common toad	Bufo bufo	Native	24	2012	September	23	43.0803	11.0194	Il Gabellino	Adulti	18 F and 6 M	50	Yes	Open
Common toad	Bufo bufo	Native	3	2013	April	16	43.0803	11.0194	Il Gabellino	Adult	1 F and 2 M	50	Yes	Open
Common toad	Bufo bufo	Native	1	2013	April	3	43.0938	11.0287	Ponte sul Merse	Adult	F	70	Yes	Urban
Common toad	Bufo bufo	Native	1	2013	April	16	43.0833	11.0255	Sbarra di Forcoli	Adult	F	70	No	Closed
Common toad	Bufo bufo	Native	7	2013	August	23	43.0803	11.0194	Il Gabellino	Adult	3 M e 4 F	50	Yes	Open
Common toad	Bufo bufo	Native	2	2013	February	1	43.0803	11.0194	Il Gabellino	Adult	F	50	Yes	Open
Common toad	Bufo bufo	Native	1	2013	July	24	43.0786	11.0197	Tornante di Boccheggiano	Adult	F	90	No	Closed
Common toad	Bufo bufo	Native	9	2013	March	8	43.0803	11.0194	Il Gabellino	Adult	7 F and 2 M	50	Yes	Open
Common toad	Bufo bufo	Native	4	2013	March	8	43.0803	11.0194	Il Gabellino	Adult	3 F and 1 M	50	Yes	Open
Common toad	Bufo bufo	Native	6	2013	March	8	43.0803	11.0194	Il Gabellino	Adult	4 F and 2 M	50	Yes	Open
Common toad	Bufo bufo	Native	4	2013	March	16	43.0803	11.0194	Il Gabellino	Adult	F	50	Yes	Open
Common toad	Bufo bufo	Native	2	2013	March	23	43.0803	11.0194	Il Gabellino	Adult	F	50	Yes	Open
Common toad	Bufo bufo	Native	1	2013	March	30	43.0755	11.0006	Ricavolo	Adult	F	70	No	Closed
Common toad	Bufo bufo	Native	1	2013	May	3	43.0801	11.0209	Fonte al Carpino	Adult	F	90	No	Closed
Common toad	Bufo bufo	Native	1	2013	May	3	43.0799	11.0192	Il Gabellino	Adult	F	50	Yes	Open
Common toad	Bufo bufo	Native	4	2013	May	17	43.0803	11.0194	Il Gabellino	Adult	M	50	Yes	Open
Common toad	Bufo bufo	Native	1	2013	May	17	43.1046	11.035	Ponte di Montieri	Adult	F	70	Yes	Closed
Common toad	Bufo bufo	Native	9	2013	October	9	43.0803	11.0194	Il Gabellino	Adult	6 F e 3 M	70	Yes	Open
Common toad	Bufo bufo	Native	1	2013	October	16	43.0803	11.0194	Il Gabellino	Adult	M	50	Yes	Open
Common toad	Bufo bufo	Native	1	2013	September	17	43.0828	10.9836	Via Basilicata - Prata	Adult	F	50	No	Urban
Common buzzard	Buteo buteo	Native	1	2011	April	28	43.0749	10.9991	Braccio di Tatti	Adult	F	70	No	Ecotone (hedgerows)
Common buzzard	Buteo buteo	Native	1	2013	June	11	43.2485	11.2947	Fogliano - San Rocco a Pilli	Adult	-	110	No	Open
Greater short-toed lark	Calandrella brachydactyla	Native	1	2013	July	3	43.2514	11.3066	Bivio di Fogliano	Adult	-	110	No	Open
Roe deer	Capreolus capreolus	Native	1	2011	April	28	42.9913	11.0686	Montemassi	Adult	?	50	No	Urban
Roe deer	Capreolus capreolus	Native	1	2011	January	13	43.0764	10.9945	Font'Aquila	Adult	M	70	No	Closed
Roe deer	Capreolus capreolus	Native	1	2012	April	28	43.2807	11.2607	Pian dei Mori	Adult	F	60	Yes	Open/Anthropized
Roe deer	Capreolus capreolus	Native	1	2012	February	23	43.0578	11.0249	I Canapai	Adult	?	90	No	Ecotone
Roe deer	Capreolus capreolus	Native	1	2012	June	9	43.0427	11.0489	Fosso di Tamabrillo	Juvenile	M	70	No	Closed
Roe deer	Capreolus capreolus	Native	1	2012	September	16	43.0896	11.0247	Sbarra di Forcoli	Adult	M	70	No	Closed
Roe deer	Capreolus capreolus	Native	1	2013	July	31	43.0878	11.029	La Madonnina di Boccheggiano	Adult	M	50	No	Closed
European nightjar	Caprimulgus europaeus	Native	1	2012	July	20	43.0605	11.019	Gabbiano	Adult	?	70	No	Open
European nightjar	Caprimulgus europaeus	Native	1	2012	July	6	43.0683	11.0188	Le Fornaci	Adult	?	50	No	Ecotone
European nightjar	Caprimulgus europaeus	Native	1	2012	September	9	43.28	11.2567	Rospaglio	Juvenile	?	50	Yes	Open
Italian three-toed skink	Chalcides chalcides	Native	1	2012	June	23	43.0859	10.982	Fonte Vecchia	Adult	M	70	No	Closed
Italian three-toed skink	Chalcides chalcides	Native	1	2013	June	19	43.0855	10.9838	Ispanto - Prata	Adult	-	50	No	Urban
Italian three-toed skink	Chalcides chalcides	Native	1	2013	September	4	42.7841	11.0911	Via Aurelia Nord - Grosseto	Adult	F	110	No	Open
Short-toed Eagle	Circaetus gallicus	Native	1	2013	June	5	42.8334	11.0837	Superstrada di Grosseto	Adult	-	110	No	Open
Hen harrier	Circus cyaneus	Native	1	2011	December	16	42.9323	11.082	Monte Lattaia	Adult	M	90	No	Open
Hawfinch	Coccothraustes coccothraustes	Native	1	2012	February	16	43.083	10.9845	Via Fratti - Prata	Adult	F	50	No	Urban
Domestic pigeon	Columba livia domestica	Introduced	1	2013	April	9	42.791	11.0904	Grosseto Nord	Adult	-	50	No	Urban
Domestic pigeon	Columba livia domestica	Introduced	1	2013	July	3	43.2514	11.3066	Bivio di Fogliano	Adult	-	110	No	Open
Domestic pigeon	Columba livia domestica	Introduced	1	2013	June	26	42.8449	11.0813	Braccagni	Adult	-	50	Yes	Urban
Domestic pigeon	Columba livia domestica	Introduced	1	2013	June	11	43.2324	11.2762	Dopo San Rocco a Pilli	Adult	-	50	No	Open
Domestic pigeon	Columba livia domestica	Introduced	1	2013	September	17	42.7841	11.0911	Via Aurelia Nord - Grosseto	Adult	-	110	No	Open
Hooded crow	Corvus cornix	Native	1	2013	July	31	43.1426	11.1175	Il Palazzetto	Adult	-	70	Yes	Urban
Blue tit	Cyanistes caeruleus	Native	1	2013	June	19	43.0806	10.984	Ponte di Prata	Juvenile	-	90	Yes	Urban
Blue tit	Cyanistes caeruleus	Native	1	2013	March	30	43.0863	10.9789	La Pilina	Adult	?	70	No	Closed
Fallow deer	Dama dama	Native	1	2013	August	2	43.1962	11.1451	Pian di Feccia	Juvenile	-	70	Yes	Open
House martin	Delichon urbica	Native	1	2013	July	31	43.2807	11.2607	Pian dei Mori	Adult	-	60	Yes	Open/Anthropized
House martin	Delichon urbica	Native	1	2013	July	17	43.083	10.9845	Via Fratti - Prata	Pullus	-	50	No	Urban
House martin	Delichon urbica	Native	2	2013	May	31	43.083	10.9845	Via Fratti - Prata	Pullus	-	50	No	Urban
House martin	Delichon urbica	Native	1	2013	September	26	43.1006	11.0366	Campiano	Adult	-	70	No	Urban
Great spotted woodpecker	Dendrocopos major	Native	1	2013	May	31	43.129	11.0766	L'Apparita	Adult	-	70	No	Closed
Little egret	Egretta garzetta	Native	1	2013	September	17	42.9824	11.0952	Bivio per Ribolla	Adult	-	90	Yes	Ecotone
Corn bunting	Emberiza calandra	Native	1	2013	August	30	43.2328	11.1751	Colonna di Montarrenti	Adult	-	70	Yes	Open
Corn bunting	Emberiza calandra	Native	1	2013	July	24	43.0991	11.0354	Bivio di Vallebuia	-	-	90	No	Closed
Corn bunting	Emberiza calandra	Native	1	2013	July	10	42.8449	11.0813	Braccagni	Adult	-	50	Yes	Urban
Cirl bunting	Emberiza cirlus	Native	1	2013	June	19	43.0427	11.0489	Fosso di Tamabrillo	Juvenile	-	70	No	Closed
Cirl bunting	Emberiza cirlus	Native	1	2013	May	24	43.0755	10.9963	Curva del Civilini	Juvenile	-	70	No	Ecotone (hedgerows)
European hedgehog	Erinaceus europaeus	Native	1	2011	August	11	43.0749	10.9991	Braccio di Tatti	Adult	M	70	No	Ecotone (hedgerows)
European hedgehog	Erinaceus europaeus	Native	1	2011	July	26	43.114	11.0498	Ponte della Balestrina	Adult	M	70	No	Closed
European hedgehog	Erinaceus europaeus	Native	1	2011	June	8	43.0324	11.0646	Meleta	Juvenile	F	90	No	Closed
European hedgehog	Erinaceus europaeus	Native	1	2011	March	24	43.2328	11.1751	Colonna di Montarrenti	Adult	F	70	Yes	Open
European hedgehog	Erinaceus europaeus	Native	1	2011	March	10	42.9323	11.082	Monte Lattaia	Adult	M	90	No	Open
European hedgehog	Erinaceus europaeus	Native	1	2011	March	24	43.1962	11.1451	Ponte della Feccia	Adult	F	70	No	Open
European hedgehog	Erinaceus europaeus	Native	1	2011	May	23	42.9913	11.0686	Montemassi	Juvenile	M	50	No	Urban
European hedgehog	Erinaceus europaeus	Native	1	2011	May	18	42.8853	11.0733	Ponte del Madonnino	Adult	F	70	No	Open/Anthropized
European hedgehog	Erinaceus europaeus	Native	1	2011	May	11	43.2392	11.2801	San Rocco a Pilli	Juvenile	?	50	No	Open
European hedgehog	Erinaceus europaeus	Native	1	2011	October	10	42.8853	11.0733	Ponte del Madonnino	Juvenile	F	70	No	Open/Anthropized
European hedgehog	Erinaceus europaeus	Native	1	2012	April	21	43.0605	11.019	Gabbiano	Adult	M	70	No	Open
European hedgehog	Erinaceus europaeus	Native	1	2012	August	23	43.0824	10.9835	Via Basilicata - Prata	Juvenile	M	50	No	Urban
European hedgehog	Erinaceus europaeus	Native	1	2012	December	11	43.2165	11.1552	Montebello	Adult	M	90	No	Open
European hedgehog	Erinaceus europaeus	Native	1	2012	December	26	42.9892	11.071	Montemassi	Juvenile	M	50	No	Urban
European hedgehog	Erinaceus europaeus	Native	1	2012	July	27	43.2982	11.3089	Bivio di Terensano	Adult	M	50	No	Urban
European hedgehog	Erinaceus europaeus	Native	1	2012	July	27	43.0859	10.982	Fonte Vecchia	Adult	M	70	No	Closed
European hedgehog	Erinaceus europaeus	Native	1	2012	June	30	43.2197	11.2734	Bivio di Rosia	Adult	M	70	No	Ecotone
European hedgehog	Erinaceus europaeus	Native	1	2012	March	29	43.0803	11.0194	Il Gabellino	Juvenile	M	50	Yes	Open
European hedgehog	Erinaceus europaeus	Native	1	2012	March	8	43.0324	11.0646	Meleta	Adult	M	90	No	Closed
European hedgehog	Erinaceus europaeus	Native	1	2012	March	22	43.2165	11.1552	Montebello	Adult	F	90	No	Open
European hedgehog	Erinaceus europaeus	Native	1	2012	May	11	43.0578	11.0249	I Canapai	Adult	F	90	No	Ecotone
European hedgehog	Erinaceus europaeus	Native	1	2012	May	4	43.1426	11.1175	Il Palazzetto	Adult	F	70	Yes	Urban
European hedgehog	Erinaceus europaeus	Native	1	2012	October	7	43.0083	10.976	Croce del Mascagni	Adult	F	70	No	Closed
European hedgehog	Erinaceus europaeus	Native	1	2012	October	7	43.0859	10.982	Fonte Vecchia	Juvenile	M	70	No	Closed
European hedgehog	Erinaceus europaeus	Native	1	2013	April	9	43.2163	11.2615	Bivio di Orgia	Adult	-	70	No	Ecotone
European hedgehog	Erinaceus europaeus	Native	1	2013	April	3	43.0762	10.9953	Font'Aquila	Adult	F	70	No	Closed
European hedgehog	Erinaceus europaeus	Native	1	2013	April	23	43.114	11.0498	Ponte della Balestrina	Juvenile	M	70	No	Closed
European hedgehog	Erinaceus europaeus	Native	1	2013	August	9	42.8449	11.0813	Braccagni	Juvenile	-	50	Yes	Urban
European hedgehog	Erinaceus europaeus	Native	1	2013	August	2	43.0755	10.9963	Curva del Civilini	Juvenile	-	70	No	Ecotone (hedgerows)
European hedgehog	Erinaceus europaeus	Native	1	2013	August	2	43.0759	10.9916	Font'Aquila	Adult	-	70	No	Closed
European hedgehog	Erinaceus europaeus	Native	1	2013	August	2	43.0759	10.9916	Font'Aquila	Adult	-	70	No	Closed
European hedgehog	Erinaceus europaeus	Native	1	2013	August	2	43.0427	11.0489	Fosso di Tamabrillo	Juvenile	-	70	No	Closed
European hedgehog	Erinaceus europaeus	Native	1	2013	August	9	42.9323	11.082	Monte Lattaia	Juvenile	F	90	No	Open
European hedgehog	Erinaceus europaeus	Native	1	2013	August	23	43.1426	11.1175	Il Palazzetto	Juvenile	-	50	No	Urban
European hedgehog	Erinaceus europaeus	Native	1	2013	August	2	43.0755	11.0006	Ricavolo	Juvenile	-	70	No	Closed
European hedgehog	Erinaceus europaeus	Native	1	2013	August	9	43.1513	11.1488	San Galgano	Adult	M	50	Yes	Open
European hedgehog	Erinaceus europaeus	Native	1	2013	August	9	42.7841	11.0911	Via Aurelia Nord - Grosseto	Adult	F	110	No	Open
European hedgehog	Erinaceus europaeus	Native	1	2013	December	18	42.9139	11.0771	Monte Lattaia	Juvenile	M	90	No	Open
European hedgehog	Erinaceus europaeus	Native	1	2013	February	8	43.0324	11.0646	Meleta	Adult	M	90	No	Closed
European hedgehog	Erinaceus europaeus	Native	1	2013	July	3	43.2485	11.2947	Fogliano - San Rocco a Pilli	Adult	-	110	No	Open
European hedgehog	Erinaceus europaeus	Native	1	2013	July	31	43.0803	11.0194	Il Gabellino	Adult	-	50	Yes	Open
European hedgehog	Erinaceus europaeus	Native	1	2013	July	31	43.129	11.0766	L'Apparita	Adult	-	70	No	Closed
European hedgehog	Erinaceus europaeus	Native	1	2013	July	24	42.8714	11.0771	Montepescali	Adult	-	90	No	Closed
European hedgehog	Erinaceus europaeus	Native	1	2013	July	24	43.258	11.3252	Mugnano	-	-	90	No	Open
European hedgehog	Erinaceus europaeus	Native	1	2013	July	10	43.2392	11.2801	San Rocco a Pilli	Adult	-	50	No	Open
European hedgehog	Erinaceus europaeus	Native	1	2013	July	31	43.2995	11.3269	Siena Sud	Adult	-	50	No	Urban
European hedgehog	Erinaceus europaeus	Native	1	2013	July	24	42.7841	11.0911	Via Aurelia Nord - Grosseto	Adult	-	110	No	Open
European hedgehog	Erinaceus europaeus	Native	1	2013	July	3	43.0828	10.9836	Via Basilicata - Prata	Juvenile	-	50	No	Urban
European hedgehog	Erinaceus europaeus	Native	1	2013	June	11	42.8449	11.0813	Braccagni	Adult	F	50	Yes	Urban
European hedgehog	Erinaceus europaeus	Native	1	2013	June	19	43.0828	10.9836	Via Basilicata - Prata	Adult	M	50	No	Urban
European hedgehog	Erinaceus europaeus	Native	1	2013	June	19	43.0828	10.9836	Via Basilicata - Prata	Juvenile	M	50	No	Urban
European hedgehog	Erinaceus europaeus	Native	1	2013	March	23	43.0755	11.0006	Ricavolo	Adult	M	70	No	Closed
European hedgehog	Erinaceus europaeus	Native	1	2013	March	23	43.28	11.2567	Rospaglio	Adult	?	50	Yes	Open
European hedgehog	Erinaceus europaeus	Native	1	2013	May	3	43.079	10.9871	Il Camparello	Adult	M	50	No	Urban
European hedgehog	Erinaceus europaeus	Native	1	2013	May	10	43.2807	11.2607	Pian dei Mori	Juvenile	M	60	Yes	Open/Anthropized
European hedgehog	Erinaceus europaeus	Native	1	2013	May	17	43.1962	11.1451	Pian di Feccia	Adult	M	70	Yes	Open
European hedgehog	Erinaceus europaeus	Native	1	2013	May	24	43.2995	11.3269	Siena Sud	Adult	M	50	No	Urban
European hedgehog	Erinaceus europaeus	Native	1	2013	November	20	43.0991	11.0354	Bivio di Vallebuia	Juvenile	M	90	No	Closed
European hedgehog	Erinaceus europaeus	Native	1	2013	November	6	43.0755	10.9963	Curva del Civilini	Juvenile	M	70	No	Ecotone (hedgerows)
Eurasian red squirrel	Erinaceus europaeus	Native	1	2013	November	6	43.0292	11.0631	Sotto Meleta	Adult	M	50	No	Closed
European hedgehog	Erinaceus europaeus	Native	1	2013	October	16	42.9139	11.0771	Monte Lattaia	Adult	M	90	No	Open
European hedgehog	Erinaceus europaeus	Native	1	2013	October	30	43.1962	11.1451	Pian di Feccia	Juvenile	F	70	Yes	Open
European hedgehog	Erinaceus europaeus	Native	1	2013	October	16	43.0292	11.0631	Sotto Meleta	Adult	M	50	No	Closed
European hedgehog	Erinaceus europaeus	Native	1	2013	September	10	43.2197	11.2734	Bivio di Rosia	Adult	M	70	No	Ecotone
European hedgehog	Erinaceus europaeus	Native	1	2013	September	10	43.1009	11.0355	Bivio per Campiano	Adult	M	90	No	Closed
European hedgehog	Erinaceus europaeus	Native	1	2013	September	26	43.2926	11.3049	Costalpino	Adult	M	50	No	Urban
European hedgehog	Erinaceus europaeus	Native	1	2013	September	4	42.8324	11.0829	Dopo sottopasso Bivio Sbirro	Adult	M	90	No	Open
European hedgehog	Erinaceus europaeus	Native	1	2013	September	4	43.079	10.9871	Il Camparello	Juvenile	-	50	No	Urban
European hedgehog	Erinaceus europaeus	Native	1	2013	September	10	42.834	11.0842	Prima sottopasso Bivio Sbirro	Adult	M	70	No	Open
European hedgehog	Erinaceus europaeus	Native	1	2013	September	10	43.25	11.2243	Rosia	Adult	F	50	No	Urban
European hedgehog	Erinaceus europaeus	Native	1	2013	September	10	42.8274	11.0826	Sopra Grosseto	Juvenile	M	50	No	Urban
European hedgehog	Erinaceus europaeus	Native	1	2013	September	10	42.7841	11.0911	Via Aurelia Nord - Grosseto	Adult	M	110	No	Open
European hedgehog	Erinaceus europaeus	Native	1	2013	September	10	43.0828	10.9836	Via Basilicata - Prata	Juvenile	M	50	No	Urban
European robin	Erithacus rubecula	Native	1	2011	February	17	43.0878	11.029	La Madonnina di Boccheggiano	Adult	?	50	No	Closed
European robin	Erithacus rubecula	Native	1	2011	January	20	43.0335	11.0589	Meleta	Adult	?	90	No	Closed
European robin	Erithacus rubecula	Native	1	2012	February	16	43.0833	10.9759	La Pilina	Adult	?	70	No	Closed
Merlin	Falco colombarius	Native	1	2013	January	17	42.7841	11.0911	Via Aurelia Nord - Grosseto	Adult	?	110	No	Open
Peregrine falcon	Falco peregrinus	Native	1	2013	September	26	43.2995	11.3269	Siena Sud	Adult	-	50	No	Urban
Eurasian hobby	Falco subbuteo	Native	1	2013	July	24	43.0578	11.0249	I Canapai	Adult	-	90	No	Ecotone
Cat	Felis catus	Introduced	1	2011	April	14	43.2165	11.1552	Montebello	Adult	F	90	No	Open
Cat	Felis catus	Introduced	1	2011	October	16	43.079	10.9871	Il Camparello	Juvenile	M	50	No	Urban
Cat	Felis catus	Introduced	1	2012	June	16	43.0605	11.019	Gabbiano	Adult	M	70	No	Ecotone
Cat	Felis catus	Introduced	1	2013	August	30	43.0759	10.9916	Font'Aquila	Adult	-	70	No	Closed
Cat	Felis catus	Introduced	1	2013	February	8	43.0827	10.9748	Botro ai Ponti	Adult	M	50	No	Ecotone
Cat	Felis catus	Introduced	1	2013	March	8	43.2514	11.3066	Bivio di Fogliano	Adult	?	110	No	Open
Cat	Felis catus	Introduced	1	2013	March	23	43.2807	11.2607	Pian dei Mori	Adult	F	60	Yes	Open/Anthropized
Cat	Felis catus	Introduced	1	2013	May	10	42.9323	11.082	Monte Lattaia	Juvenile	-	90	No	Open
Cat	Felis catus	Introduced	1	2013	October	2	43.1426	11.1175	Il Palazzetto	Adult	M	50	No	Urban
Cat	Felis catus	Introduced	1	2013	September	17	42.9139	11.0771	Monte Lattaia	Cub	M	90	No	Open
Common chaffinch	Fringilla coelebs	Native	1	2012	February	9	43.0811	11.0047	Ricavolo	Adult	M	70	No	Closed
Common chaffinch	Fringilla coelebs	Native	1	2013	February	22	43.0427	11.0489	Fosso di Tamabrillo	Adult	M	70	No	Closed
Crested lark	Galerida cristata	Native	1	2012	March	22	42.9323	11.082	Monte Lattaia	Adult	?	90	No	Open
Eurasian jay	Garrulus glandarius	Native	1	2011	June	8	43.0686	11.0195	Ponte della Balia	Adult	?	70	No	Closed
Eurasian jay	Garrulus glandarius	Native	1	2011	September	14	43.129	11.0766	L'Apparita	Adult	?	70	No	Closed
Eurasian jay	Garrulus glandarius	Native	1	2012	August	16	43.0749	10.9991	Braccio di Tatti	Adult	?	70	No	Ecotone (hedgerows)
Eurasian jay	Garrulus glandarius	Native	1	2012	July	6	43.0749	10.9991	Braccio di Tatti	Adult	?	70	No	Ecotone (hedgerows)
Eurasian jay	Garrulus glandarius	Native	1	2012	September	23	43.2165	11.1552	Montebello	Adult	?	90	No	Open
Eurasian jay	Garrulus glandarius	Native	1	2013	April	16	43.2165	11.1552	Montebello	Adult	-	90	No	Open
Eurasian jay	Garrulus glandarius	Native	1	2013	August	9	43.0827	10.9748	Botro ai Ponti	Adult	-	50	No	Ecotone
Eurasian jay	Garrulus glandarius	Native	1	2013	August	2	43.0878	11.029	La Madonnina di Boccheggiano	Adult	-	50	No	Closed
Eurasian jay	Garrulus glandarius	Native	1	2013	July	24	43.0869	11.0339	Boccheggiano	Juvenile	-	50	Yes	Urban
Eurasian jay	Garrulus glandarius	Native	1	2013	July	31	43.0759	10.9916	Font'Aquila	Adult	-	70	No	Closed
Eurasian jay	Garrulus glandarius	Native	1	2013	July	31	43.0759	10.9916	Font'Aquila	Adult	-	70	No	Closed
Eurasian jay	Garrulus glandarius	Native	1	2013	July	17	43.2165	11.1552	Montebello	Adult	-	90	No	Open
Eurasian jay	Garrulus glandarius	Native	1	2013	July	17	43.258	11.3252	Mugnano	Adult	-	90	No	Open
Green whip snake	Hierophis virdiflavus	Native	1	2011	August	23	43.0824	10.9835	Via Basilicata - Prata	Juvenile	?	50	No	Urban
Green whip snake	Hierophis virdiflavus	Native	1	2012	August	16	43.0838	10.9846	Il Pianello - Prata	Juvenile	?	50	No	Urban
Green whip snake	Hierophis virdiflavus	Native	1	2012	June	23	43.0801	11.0209	Fonte al Carpino	Adult	M	90	No	Closed
Green whip snake	Hierophis virdiflavus	Native	2	2013	August	30	43.0863	10.9789	La Pilina	Juvenile	-	70	No	Closed
Green whip snake	Hierophis virdiflavus	Native	1	2013	July	31	43.1962	11.1451	Pian di Feccia	Adult	-	70	Yes	Open
Green whip snake	Hierophis virdiflavus	Native	1	2013	June	26	42.8777	11.078	Bivio per Montepescali	Adult	-	90	No	Closed
Green whip snake	Hierophis virdiflavus	Native	1	2013	June	19	43.0828	10.9836	Via Basilicata - Prata	Juvenile	-	50	No	Urban
Green whip snake	Hierophis virdiflavus	Native	1	2013	May	10	43.0686	11.0195	Ponte della Balia	Adult	-	70	No	Closed
Barn swallow	Hirundo rustica	Native	1	2013	August	9	43.258	11.3252	Mugnano	Adult	-	90	No	Open
Barn swallow	Hirundo rustica	Native	1	2013	July	24	43.1962	11.1451	Pian di Feccia	Adult	-	70	Yes	Open
Savi's pipistrelle	Hypsugo savii	Native	1	2011	May	4	42.9323	11.082	Monte Lattaia	Adult	M	90	No	Open
Crested porcupine	Hystrix cristata	Introduced	1	2011	April	14	43.0762	10.9953	Font'Aquila	Juvenile	M	70	No	Closed
Crested porcupine	Hystrix cristata	Introduced	1	2011	April	28	43.0755	11.0006	Ricavolo	Juvenile	?	70	No	Closed
Crested porcupine	Hystrix cristata	Introduced	1	2011	August	18	43.0749	10.9991	Braccio di Tatti	Adult	F	70	No	Ecotone (hedgerows)
Crested porcupine	Hystrix cristata	Introduced	1	2011	December	2	43.0827	10.9748	Botro ai Ponti	Adult	F	50	No	Ecotone
Crested porcupine	Hystrix cristata	Introduced	1	2011	February	4	43.2328	11.1751	Colonna di Montarrenti	Juvenile	M	70	Yes	Open
Crested porcupine	Hystrix cristata	Introduced	1	2011	March	31	43.2807	11.2607	Pian dei Mori	Adult	?	60	Yes	Open/Anthropized
Crested porcupine	Hystrix cristata	Introduced	1	2011	November	17	43.0844	11.028	Le 4 strade di Boccheggiano	Adult	F	70	No	Closed
Crested porcupine	Hystrix cristata	Introduced	1	2011	October	24	43.2328	11.1751	Colonna di Montarrenti	Juvenile	F	70	Yes	Open
Crested porcupine	Hystrix cristata	Introduced	1	2011	October	30	43.0324	11.0646	Meleta	Juvenile	M	90	No	Closed
Crested porcupine	Hystrix cristata	Introduced	1	2011	October	17	43.2392	11.2801	San Rocco a Pilli	Adult	?	50	No	Open
Crested porcupine	Hystrix cristata	Introduced	1	2011	September	14	42.9913	11.0686	Montemassi	Juvenile	F	50	No	Urban
Crested porcupine	Hystrix cristata	Introduced	1	2012	February	16	43.0844	11.028	Le 4 strade di Boccheggiano	Adult	?	70	No	Closed
Crested porcupine	Hystrix cristata	Introduced	1	2012	January	3	43.25	11.2243	Rosia	Juvenile	M	50	No	Urban
Crested porcupine	Hystrix cristata	Introduced	1	2012	July	20	43.0427	11.0489	Fosso di Tamabrillo	Juvenile	F	70	No	Closed
Crested porcupine	Hystrix cristata	Introduced	1	2012	July	6	43.0795	11.0192	Il Gabellino	Juvenile	F	50	Yes	Open
Crested porcupine	Hystrix cristata	Introduced	1	2012	June	2	43.0324	11.0646	Meleta	Adult	F	90	No	Closed
Crested porcupine	Hystrix cristata	Introduced	1	2012	March	15	43.129	11.0766	Le Vene	Adult	M	90	No	Closed
Crested porcupine	Hystrix cristata	Introduced	1	2012	March	1	43.1513	11.1488	San Galgano	Adult	?	50	Yes	Open
Crested porcupine	Hystrix cristata	Introduced	1	2012	May	11	43.08	11.017	Il Poggiolo	Adult	M	70	No	Open
Crested porcupine	Hystrix cristata	Introduced	1	2012	October	28	43.1962	11.1451	Pian di Feccia	Adult	F	70	Yes	Open
Crested porcupine	Hystrix cristata	Introduced	1	2012	October	7	43.1046	11.035	Ponte di Montieri	Juvenile	F	70	Yes	Closed
Crested porcupine	Hystrix cristata	Introduced	1	2013	April	3	43.0991	11.0354	Bivio di Vallebuia	Juvenile	M	90	No	Closed
Crested porcupine	Hystrix cristata	Introduced	1	2013	April	3	43.0938	11.0287	Ponte sul Merse	Juvenile	-	70	Yes	Urban
Crested porcupine	Hystrix cristata	Introduced	1	2013	August	9	43.0788	10.9882	Curva di San Giuseppe	Juvenile	-	70	No	Open
Crested porcupine	Hystrix cristata	Introduced	1	2013	December	4	43.0833	11.0255	Sbarra di Forcoli	Cub	M	70	No	Closed
Crested porcupine	Hystrix cristata	Introduced	1	2013	February	15	43.0749	10.9991	Braccio di Tatti	Adult	F	70	No	Ecotone (hedgerows)
Crested porcupine	Hystrix cristata	Introduced	1	2013	February	15	43.1426	11.1175	Il Palazzetto	Adult	F	70	Yes	Urban
Western green lizard	Lacerta bilineata	Native	1	2011	July	26	43.0686	11.0195	Ponte della Balia	Adult	M	70	No	Closed
Western green lizard	Lacerta bilineata	Native	1	2012	April	28	43.0878	11.029	La Madonnina di Boccheggiano	Adult	M	50	No	Closed
Western green lizard	Lacerta bilineata	Native	1	2012	September	9	43.079	10.9871	Il Camparello	Adult	F	50	No	Urban
Western green lizard	Lacerta bilineata	Native	1	2012	September	23	43.0844	11.028	Le 4 strade di Boccheggiano	Adult	M	70	No	Closed
Western green lizard	Lacerta bilineata	Native	1	2013	July	3	43.0988	11.0372	Campianaccio	Adult	F	70	No	Open
Western green lizard	Lacerta bilineata	Native	1	2013	July	31	43.0786	11.0197	Tornante di Boccheggiano	Adult	F	90	No	Closed
Western green lizard	Lacerta bilineata	Native	1	2013	June	5	43.0427	11.0489	Fosso di Tamabrillo	Adult	M	70	No	Closed
Western green lizard	Lacerta bilineata	Native	1	2013	June	11	43.129	11.0766	L'Apparita	Adult	-	70	No	Closed
Western green lizard	Lacerta bilineata	Native	1	2013	September	4	42.9016	11.0696	Fra Braccagni e Monte Lattaia	Adult	M	90	No	Open
European brown hare	Lepus europaeus	Native	1	2011	January	27	43.2197	11.2734	Bivio di Rosia	Adult	F	70	No	Ecotone
European brown hare	Lepus europaeus	Native	1	2011	November	17	42.8449	11.0813	Braccagni	Adult	M	50	Yes	Urban
European brown hare	Lepus europaeus	Native	1	2011	November	17	43.0427	11.0489	Fosso di Tamabrillo	Adult	F	70	No	Closed
European brown hare	Lepus europaeus	Native	1	2013	August	30	43.0803	11.0194	Il Gabellino	-	-	50	Yes	Open
European brown hare	Lepus europaeus	Native	1	2013	July	10	43.0578	11.0249	I Canapai	Adult	-	90	No	Ecotone
European brown hare	Lepus europaeus	Native	1	2013	July	24	43.2807	11.2607	Pian dei Mori	Adult	-	60	Yes	Open/Anthropized
European brown hare	Lepus europaeus	Native	1	2013	March	30	43.0773	11.0078	Petriccio	Adult	M	50	No	Closed
European brown hare	Lepus europaeus	Native	1	2013	May	17	43.2485	11.2947	Fogliano - San Rocco a Pilli	Juvenile	-	110	No	Open
European brown hare	Lepus europaeus	Native	1	2013	October	23	43.0803	11.0194	Il Gabellino	Adult	M	50	Yes	Open
European brown hare	Lepus europaeus	Native	1	2013	September	17	42.8449	11.0813	Braccagni	Juvenile	-	50	Yes	Urban
Woodlark	Lullula arborea	Native	1	2013	July	10	43.2165	11.1552	Montebello	Adult	-	90	No	Open
Woodlark	Lullula arborea	Native	1	2013	September	10	43.0772	11.0068	Bivio per Petriccio	-	-	90	No	Closed
Common nightingale	Luscinia megarhynchos	Native	1	2012	June	9	43.0948	10.9878	Font'Aquila	Adult	?	70	No	Closed
Stone marten	Martes foina	Native	1	2011	August	11	43.1046	11.035	Ponte di Montieri	Juvenile	M	70	Yes	Closed
Stone marten	Martes foina	Native	1	2011	December	16	42.8853	11.0733	Ponte del Madonnino	Adult	?	70	No	Open/Anthropized
Stone marten	Martes foina	Native	1	2011	January	20	43.25	11.2243	Rosia	Adult	M	50	No	Urban
Stone marten	Martes foina	Native	1	2011	October	24	43.129	11.0766	L'Apparita	Juvenile	?	70	No	Closed
Stone marten	Martes foina	Native	1	2012	March	15	42.8334	11.0837	Superstrada di Grosseto	Adult	F	110	No	Open
Stone marten	Martes foina	Native	1	2013	March	30	43.0827	10.9748	Botro ai Ponti	Juvenile	?	50	No	Ecotone
Pine marten	Martes martes	Native	1	2011	December	2	43.0755	11.0006	Ricavolo	Juvenile	F	70	No	Closed
Pine marten	Martes martes	Native	1	2011	July	13	43.0764	10.9945	Font'Aquila	Adult	M	70	No	Closed
Pine marten	Martes martes	Native	1	2012	August	30	43.0427	11.0489	Fosso di Tamabrillo	Juvenile	M	70	No	Closed
Pine marten	Martes martes	Native	1	2012	August	16	43.0833	11.0255	Sbarra di Forcoli	Adult	M	70	No	Closed
Pine marten	Martes martes	Native	1	2012	December	4	43.0823	10.9805	Ponte di Prata	Adult	?	90	Yes	Urban
Pine marten	Martes martes	Native	1	2012	January	17	43.2165	11.1552	Montebello	Adult	F	90	No	Open
Pine marten	Martes martes	Native	1	2013	August	2	43.0863	10.9789	La Pilina	Adult	M	70	No	Closed
Pine marten	Martes martes	Native	1	2013	January	24	43.0686	11.0195	Ponte della Balia	Adult	M	70	No	Closed
Pine marten	Martes martes	Native	1	2013	July	3	43.0991	11.0354	Bivio di Vallebuia	Adult	M	90	No	Closed
Pine marten	Martes martes	Native	1	2013	July	24	43.0991	11.0354	Bivio di Vallebuia	Adult	-	90	No	Closed
Pine marten	Martes martes	Native	1	2013	July	24	43.0427	11.0489	Fosso di Tamabrillo	Adult	M	70	No	Closed
Pine marten	Martes martes	Native	1	2013	June	5	43.2206	11.2745	Bivio per Brenna	Adult	M	90	No	Open
Pine marten	Martes martes	Native	1	2013	June	5	43.2035	11.1485	Castello di Frosini	-	-	50	Yes	Urban
Pine marten	Martes martes	Native	1	2013	March	30	43.0826	10.9755	Ponte di Prata	Adult	F	90	Yes	Urban
Pine marten	Martes martes	Native	1	2013	May	24	43.1426	11.1175	Il Palazzetto	Adult	F	70	Yes	Urban
Pine marten	Martes martes	Native	1	2013	May	10	43.0324	11.0646	Meleta	Adult	M	90	No	Closed
Pine marten	Martes martes	Native	1	2013	November	13	42.9824	11.0952	Bivio per Ribolla	Adult	-	90	Yes	Ecotone
Spanish pond turtle	Mauremys leprosa	Introduced	1	2013	October	23	43.0686	11.0195	Ponte della Balia	Adult	?	70	No	Closed
Spanish pond turtle	Mauremys leprosa	Introduced	1	2013	October	23	43.0686	11.0195	Ponte della Balia	Juvenile	?	70	No	Closed
Eurasian badger	Meles meles	Native	1	2011	April	14	42.8334	11.0837	Superstrada di Grosseto	Adult	M	110	No	Open
Eurasian badger	Meles meles	Native	1	2011	August	18	43.25	11.2243	Rosia	Juvenile	F	50	No	Urban
Eurasian badger	Meles meles	Native	1	2011	February	10	43.2465	11.2121	Ponte della Pia	Juvenile	M	70	No	Closed
Eurasian badger	Meles meles	Native	1	2011	February	4	42.8334	11.0837	Superstrada di Grosseto	Adult	F	110	No	Open
Eurasian badger	Meles meles	Native	1	2011	January	20	43.2197	11.2734	Bivio di Rosia	Adult	F	70	No	Ecotone
Eurasian badger	Meles meles	Native	1	2011	March	24	43.2807	11.2607	Pian dei Mori	Adult	F	60	Yes	Open/Anthropized
Eurasian badger	Meles meles	Native	1	2011	March	31	43.114	11.0498	Ponte della Balestrina	Adult	F	70	No	Closed
Eurasian badger	Meles meles	Native	1	2011	March	31	43.0801	11.0209	Strada di Boccheggiano	Juvenile	F	70	No	Closed
Eurasian badger	Meles meles	Native	1	2011	November	3	43.0749	10.9991	Braccio di Tatti	Adult	F	70	No	Ecotone (hedgerows)
Eurasian badger	Meles meles	Native	1	2011	October	24	43.0605	11.019	Gabbiano	Juvenile	?	70	No	Ecotone
Eurasian badger	Meles meles	Native	1	2012	April	21	43.0878	11.029	La Madonnina di Boccheggiano	Adult	M	50	No	Closed
Eurasian badger	Meles meles	Native	1	2012	July	13	43.129	11.0766	L'Apparita	Adult	M	70	No	Closed
Eurasian badger	Meles meles	Native	1	2012	May	18	43.0759	10.9916	Font'Aquila	Adult	M	70	No	Closed
Eurasian badger	Meles meles	Native	1	2012	November	20	43.0878	11.029	La Madonnina di Boccheggiano	Juvenile	F	50	No	Closed
Eurasian badger	Meles meles	Native	1	2012	November	6	43.1513	11.1488	San Galgano	Juvenile	M	50	Yes	Open
Eurasian badger	Meles meles	Native	1	2012	November	20	42.7841	11.0911	Via Aurelia Nord - Grosseto	Adult	F	110	No	Open
Eurasian badger	Meles meles	Native	1	2012	October	28	43.1513	11.1488	San Galgano	Adult	M	50	Yes	Open
Eurasian badger	Meles meles	Native	1	2013	April	23	43.129	11.0766	Le Vene	Adult	M	90	No	Closed
Eurasian badger	Meles meles	Native	1	2013	April	30	43.2823	11.3323	Superstrada Siena-Grosseto	Juvenile	M	110	No	Open
Eurasian badger	Meles meles	Native	1	2013	December	18	43.2035	11.1485	Castello di Frosini	Adult	F	50	Yes	Urban
Eurasian badger	Meles meles	Native	1	2013	December	27	43.0803	11.0194	Il Gabellino	Adult	M	50	Yes	Open
Eurasian badger	Meles meles	Native	1	2013	December	11	43.0292	11.0631	Sotto Meleta	Adult	M	50	No	Closed
Eurasian badger	Meles meles	Native	1	2013	February	15	43.0683	11.0188	Le Fornaci	Juvenile	M	50	No	Ecotone
Eurasian badger	Meles meles	Native	1	2013	January	10	43.0427	11.0489	Fosso di Tamabrillo	Adult	F	70	No	Closed
Eurasian badger	Meles meles	Native	2	2013	June	11	42.8777	11.078	Bivio per Montepescali	Juvenile	both M	90	No	Closed
Eurasian badger	Meles meles	Native	1	2013	March	30	43.0427	11.0489	Fosso di Tamabrillo	Juvenile	?	70	No	Closed
Eurasian badger	Meles meles	Native	1	2013	March	2	43.0896	11.0247	Sbarra di Forcoli	Juvenile	F	70	No	Closed
Eurasian badger	Meles meles	Native	1	2013	March	2	43.0896	11.0247	Sbarra di Forcoli	Adult	M	70	No	Closed
Eurasian badger	Meles meles	Native	1	2013	May	24	43.079	10.9871	Il Camparello	Juvenile	F	50	No	Urban
Eurasian badger	Meles meles	Native	1	2013	May	24	43.0803	11.0194	Il Gabellino	Adult	M	50	Yes	Open
Eurasian badger	Meles meles	Native	1	2013	May	17	43.1426	11.1175	Il Palazzetto	Adult	-	70	Yes	Urban
Eurasian badger	Meles meles	Native	1	2013	May	10	43.0833	11.0255	Sbarra di Forcoli	Adult	M	70	No	Closed
Eurasian badger	Meles meles	Native	1	2013	November	27	43.2982	11.3089	Bivio di Terensano	Adult	-	50	No	Urban
Eurasian badger	Meles meles	Native	1	2013	October	30	43.1962	11.1451	Pian di Feccia	Adult	-	70	Yes	Open
Eurasian badger	Meles meles	Native	1	2013	September	26	43.1962	11.1451	Pian di Feccia	Adult	-	70	Yes	Open
Eurasian badger	Meles meles	Native	1	2013	September	17	42.834	11.0842	Prima sottopasso Bivio Sbirro	Adult	M	70	No	Open
European bee-eater	Merops apiaster	Native	1	2011	August	23	43.1962	11.1451	Pian di Feccia	Adult	?	70	Yes	Open
European bee-eater	Merops apiaster	Native	1	2011	September	28	43.1962	11.1451	Pian di Feccia	Adult	?	70	Yes	Open
Savi's pine vole	Microtus savii	Native	1	2011	May	23	42.9323	11.082	Monte Lattaia	Adult	M	90	No	Open
Blue rock thrush	Monticola solitarius	Native	1	2012	December	18	43.2982	11.3089	Bivio di Terensano	Adult	?	50	No	Urban
European flycatcher	Muscicapa striata	Native	1	2013	July	31	43.0828	10.9836	Via Basilicata - Prata	Adult	-	50	No	Urban
Weasel	Mustela nivalis	Native	1	2013	July	24	42.7841	11.0911	Via Aurelia Nord - Grosseto	Adult	-	110	No	Open
European polecat	Mustela putorius	Native	1	2011	July	26	43.2807	11.2607	Pian dei Mori	Adult	F	60	Yes	Open/Anthropized
European polecat	Mustela putorius	Native	1	2012	March	15	43.0833	10.9759	La Pilina	Adult	M	70	No	Closed
European polecat	Mustela putorius	Native	1	2013	August	30	43.1962	11.1451	Pian di Feccia	Adult	M	70	Yes	Open
European polecat	Mustela putorius	Native	1	2013	January	17	43.0769	11.0047	Il Gabellino	Juvenile	F	50	Yes	Open
European polecat	Mustela putorius	Native	1	2013	July	24	43.258	11.3252	Mugnano	-	-	90	No	Open
European polecat	Mustela putorius	Native	1	2013	July	10	43.1426	11.1175	Il Palazzetto	Adult	-	50	No	Urban
European polecat	Mustela putorius	Native	1	2013	November	13	43.0844	11.028	Le 4 strade di Boccheggiano	?????	????	70	No	Closed
European polecat	Mustela putorius	Native	1	2013	October	9	43.0749	10.9991	Braccio di Tatti	Adult	M	70	No	Ecotone (hedgerows)
European polecat	Mustela putorius	Native	1	2013	September	26	43.2197	11.2734	Bivio di Rosia	Adult	-	70	No	Ecotone
Coypu	Myocastor coypus	Introduced	1	2013	March	23	43.28	11.2567	Rospaglio	Adult	F	50	Yes	Open
Coypu	Myocastor coypus	Introduced	1	2011	February	17	42.8449	11.0813	Braccagni	Adult	?	50	Yes	Urban
Coypu (white)	Myocastor coypus	Introduced	1	2011	February	10	42.9001	11.0704	Ponte del Madonnino	Adult	?	70	No	Open/Anthropized
Coypu	Myocastor coypus	Introduced	1	2011	January	27	43.2807	11.2607	Pian dei Mori	Adult	?	60	Yes	Open/Anthropized
Coypu	Myocastor coypus	Introduced	1	2011	January	7	43.0815	10.9821	Ponte di Prata	Adult	F	50	Yes	Urban
Bank vole	Myodes glareolus	Native	1	2011	July	6	43.2165	11.1552	Montebello	Adult	M	90	No	Open
Bank vole	Myodes glareolus	Native	1	2011	May	11	43.2465	11.2121	Ponte della Pia	Adult	M	70	No	Closed
Bank vole	Myodes glareolus	Native	1	2013	June	5	43.0324	11.0646	Meleta	Adult	M	90	No	Closed
Scops owl	Otus scops	Native	2	2013	August	9	43.0827	10.9748	Botro ai Ponti	Adult	-	50	No	Ecotone
Italian Sparrow	Passer italiae	Native	1	2011	March	24	43.0824	10.9835	Via Basilicata - Prata	Adult	M	50	No	Urban
Italian Sparrow	Passer italiae	Native	1	2013	July	31	43.0749	10.9991	Braccio di Tatti	Juvenile	-	70	No	Ecotone (hedgerows)
Italian Sparrow	Passer italiae	Native	1	2013	May	17	43.0824	10.9835	Via Basilicata - Prata	Adult	F	50	No	Urban
Eurasian tree sparrow	Passer montanus	Native	1	2013	June	26	43.0828	10.9836	Via Basilicata - Prata	Pullus	-	50	No	Urban
Green frog	Pelophylax sp.	Native	1	2012	March	8	43.0803	11.0194	Il Gabellino	Adult	F	50	Yes	Open
Green frog	Pelophylax sp.	Native	1	2013	May	17	43.114	11.0498	Ponte della Balestrina	Adult	M	70	No	Closed
Grey partridge	Perdix perdix	Native	1	2013	August	16	43.2485	11.2947	Fogliano - San Rocco a Pilli	Adult	-	110	No	Open
Common pheasant	Phasianus colchicus	Introduced	1	2011	February	17	42.9323	11.082	Monte Lattaia	Adult	F	90	No	Open
Common pheasant	Phasianus colchicus	Introduced	1	2011	June	15	43.0755	11.0006	Ricavolo	Adult	F	70	No	Closed
Common pheasant	Phasianus colchicus	Introduced	1	2012	July	13	42.8449	11.0813	Braccagni	Adult	F	50	Yes	Urban
Common pheasant	Phasianus colchicus	Introduced	1	2012	September	16	42.8334	11.0837	Superstrada di Grosseto	Adult	M	110	No	Open
Common pheasant	Phasianus colchicus	Introduced	1	2013	August	16	43.0803	11.0194	Il Gabellino	Adult	M	50	Yes	Open
Common pheasant	Phasianus colchicus	Introduced	1	2013	August	30	43.0803	11.0194	Il Gabellino	Adult	F	50	Yes	Open
Common pheasant	Phasianus colchicus	Introduced	1	2013	August	23	43.2209	11.2742	Palazzo a Merse	Juvenile	F	90	No	Ecotone
Common pheasant	Phasianus colchicus	Introduced	1	2013	August	2	43.0755	11.0006	Ricavolo	Adult	F	70	No	Closed
Common pheasant	Phasianus colchicus	Introduced	1	2013	August	23	43.2373	11.2245	Rosia	Juvenile	F	50	No	Urban
Common pheasant	Phasianus colchicus	Introduced	1	2013	July	31	43.0755	11.0006	Ricavolo	Adult	M	70	No	Closed
Common pheasant	Phasianus colchicus	Introduced	1	2013	July	31	43.0755	11.0006	Ricavolo	Adult	F	70	No	Closed
Common pheasant	Phasianus colchicus	Introduced	1	2013	September	26	42.9139	11.0771	Monte Lattaia	Juvenile	F	90	No	Open
Magpie	Pica pica	Native	1	2011	March	24	43.0683	11.0188	Le Fornaci	Adult	?	50	No	Ecotone
Magpie	Pica pica	Native	1	2013	April	30	43.2823	11.3323	Superstrada Siena-Grosseto	Adult	-	110	No	Open
Magpie	Pica pica	Native	1	2013	June	5	42.8449	11.0813	Braccagni	Juvenile	-	50	Yes	Urban
Green woodpecker	Picus viridis	Native	1	2012	February	23	43.0083	10.976	Croce del Mascagni	Adult	?	70	No	Closed
Long-eared bat	Plecotus sp.	Native	1	2012	March	29	42.9323	11.082	Monte Lattaia	Adult	M	90	No	Open
Wall lizard	Podarcis muralis	Native	1	2013	June	19	43.0855	10.9838	Ispanto - Prata	Adult	M	50	No	Urban
Wall lizard	Podarcis muralis	Native	1	2013	June	11	43.0826	10.9836	Via Basilicata - Prata	Adult	M	50	No	Urban
Wall lizard	Podarcis muralis	Native	1	2013	June	26	43.0828	10.9836	Via Basilicata - Prata	Adult	M	50	No	Urban
Wall lizard	Podarcis muralis	Native	1	2013	May	31	43.0801	11.0209	Fonte al Carpino	Adult	F	90	No	Closed
Italian wall lizard	Podarcis sicula	Native	1	2013	August	16	43.083	10.9845	Via Fratti - Prata	Adult	M	50	No	Urban
Italian wall lizard	Podarcis sicula	Native	1	2013	July	31	43.0828	10.9836	Via Basilicata - Prata	Adult	M	50	No	Urban
Italian wall lizard	Podarcis sicula	Native	1	2013	June	19	42.791	11.0888	Inizio di Grosseto	Adult	M	50	Yes	Urban
Unidentified lizard	Podarcis sp.	Native	1	2011	August	18	43.2465	11.2121	Ponte della Pia	Adult	?	70	No	Closed
Unidentified lizard	Podarcis sp.	Native	1	2011	July	6	43.0427	11.0489	Fosso di Tamabrillo	Adult	?	70	No	Closed
Unidentified lizard	Podarcis sp.	Native	1	2011	July	20	43.129	11.0766	L'Apparita	Adult	?	70	No	Closed
Unidentified lizard	Podarcis sp.	Native	1	2011	October	17	43.2197	11.2734	Bivio di Rosia	Adult	?	70	No	Ecotone
Unidentified lizard	Podarcis sp.	Native	1	2011	September	21	43.0686	11.0195	Ponte della Balia	Adult	M	70	No	Closed
Unidentified lizard	Podarcis sp.	Native	1	2012	March	29	43.114	11.0498	Ponte della Balestrina	Adult	?	70	No	Closed
Unidentified lizard	Podarcis sp.	Native	1	2012	May	25	43.0762	10.9953	Font'Aquila	Adult	?	70	No	Closed
Dunnock	Prunella modularis	Native	1	2012	June	2	43.0948	10.9878	Font'Aquila	Adult	?	70	No	Closed
Italian green toad	Bufotes viridis balearicus	Native	3	2011	March	24	42.8449	11.0813	Braccagni	Adult	F	50	Yes	Urban
Italian green toad	Bufotes viridis balearicus	Native	4	2011	March	10	43.1962	11.1451	Pian di Feccia	Adult	F	70	Yes	Open
Italian green toad	Bufotes viridis balearicus	Native	2	2011	October	10	42.8449	11.0813	Braccagni	Adult	M	50	Yes	Urban
Italian green toad	Bufotes viridis balearicus	Native	1	2012	March	8	43.0803	11.0194	Il Gabellino	Adult	F	50	Yes	Open
Italian green toad	Bufotes viridis balearicus	Native	1	2013	July	31	43.1962	11.1451	Pian di Feccia	Adult	-	70	Yes	Open
Italian green toad	Bufotes viridis balearicus	Native	3	2013	October	9	42.8449	11.0813	Braccagni	Adult	M	50	Yes	Urban
Agile frog	Rana dalmatina	Native	3	2011	September	14	43.0795	11.0192	Il Gabellino	Adult	M	50	Yes	Open
Agile frog	Rana dalmatina	Native	1	2012	February	9	43.0878	11.029	La Madonnina di Boccheggiano	Adult	F	50	No	Closed
Agile frog	Rana dalmatina	Native	7	2012	March	8	43.0749	10.9991	Braccio di Tatti	Adult	4 F and 3 M	70	No	Ecotone (hedgerows)
Agile frog	Rana dalmatina	Native	2	2013	April	16	43.0755	10.9963	Curva del Civilini	Adult	M	70	No	Ecotone (hedgerows)
Agile frog	Rana dalmatina	Native	1	2013	April	16	43.0801	11.0209	Fonte al Carpino	Adult	M	90	No	Closed
Agile frog	Rana dalmatina	Native	1	2013	August	30	43.0759	10.9916	Font'Aquila	Adult	M	70	No	Closed
Agile frog	Rana dalmatina	Native	3	2013	February	1	43.0803	11.0194	Il Gabellino	Adult	F	50	Yes	Open
Agile frog	Rana dalmatina	Native	2	2013	February	1	43.0878	11.029	La Madonnina di Boccheggiano	Adult	F	50	No	Closed
Agile frog	Rana dalmatina	Native	3	2013	March	16	43.0803	11.0194	Il Gabellino	Adult	F	50	Yes	Open
Black rat	Rattus rattus	Introduced	1	2013	May	31	43.2485	11.2947	Fogliano - San Rocco a Pilli	Adult	-	110	No	Open
Black rat	Rattus rattus	Introduced	2	2013	November	6	43.2995	11.3269	Siena Sud	Adult	-	50	No	Urban
European stonechat	Saxicola rubicola	Native	1	2013	October	30	43.2807	11.2607	Pian dei Mori	Adult	M	60	Yes	Open/Anthropized
Eurasian red squirrel	Sciurus vulgaris	Native	1	2011	September	28	43.0795	11.0192	Il Gabellino	Juvenile	M	50	Yes	Open
Eurasian red squirrel	Sciurus vulgaris	Native	1	2012	August	16	43.0801	11.0209	Fonte al Carpino	Juvenile	F	90	No	Closed
Eurasian red squirrel	Sciurus vulgaris	Native	1	2012	July	13	43.129	11.0766	L'Apparita	Juvenile	F	70	No	Closed
Eurasian red squirrel	Sciurus vulgaris	Native	1	2012	July	27	43.2214	11.1636	Pentolina	Juvenile	M	90	No	Closed
Eurasian red squirrel	Sciurus vulgaris	Native	1	2012	May	4	43.2982	11.3089	Bivio di Terensano	Adult	M	50	No	Urban
Eurasian red squirrel	Sciurus vulgaris	Native	1	2012	September	23	43.0762	10.9953	Font'Aquila	Juvenile	M	70	No	Closed
Eurasian red squirrel	Sciurus vulgaris	Native	1	2012	September	16	42.791	11.0904	UPIM - Grosseto	Adult	-	50	No	Urban
Eurasian red squirrel	Sciurus vulgaris	Native	1	2013	August	2	43.0988	11.0372	Campianaccio	Adult	-	70	No	Ecotone (hedgerows)
Eurasian red squirrel	Sciurus vulgaris	Native	1	2013	July	17	43.258	11.3252	Mugnano	Adult	-	90	No	Open
Eurasian red squirrel	Sciurus vulgaris	Native	1	2013	July	31	43.2891	11.2711	Volte Basse	Juvenile	-	90	Yes	Open
Eurasian red squirrel	Sciurus vulgaris	Native	1	2013	March	8	43.2514	11.3066	Bivio di Fogliano	Adult	?	110	No	Open
Eurasian red squirrel	Sciurus vulgaris	Native	1	2013	October	9	43.2485	11.2947	Fogliano - San Rocco a Pilli	Adult	-	110	No	Open
Eurasian red squirrel	Sciurus vulgaris	Native	1	2013	September	26	43.2035	11.1485	Castello di Frosini	Adult	-	50	Yes	Urban
Eurasian red squirrel	Sciurus vulgaris	Native	1	2013	September	26	43.0756	11.0007	Ricavolo	Adult	-	70	No	Closed
Eurasian red squirrel	Sciurus vulgaris	Native	1	2013	September	26	43.2995	11.3269	Siena Sud	Adult	-	50	No	Urban
European serin	Serinus serinus	Native	1	2013	June	5	43.0988	11.0372	Campianaccio	Adult	-	70	No	Open
Eurasian collared dove	Streptopelia decaocto	Native	1	2013	July	24	42.8449	11.0813	Braccagni	Adult	-	50	Yes	Urban
Eurasian collared dove	Streptopelia decaocto	Native	1	2013	July	24	43.0806	10.984	Ponte di Prata	Adult	-	90	Yes	Urban
Eurasian collared dove	Streptopelia decaocto	Native	1	2013	September	26	43.2995	11.3269	Siena Sud	Adult	-	50	No	Urban
Eurasian collared dove	Streptopelia decaocto	Native	1	2013	September	4	42.7841	11.0911	Via Aurelia Nord - Grosseto	Adult	-	110	No	Open
Turtle dove	Streptopelia turtur	Native	1	2013	July	3	43.2485	11.2947	Fogliano - San Rocco a Pilli	Adult	-	110	No	Open
Tawny owl	Strix aluco	Native	1	2011	March	10	43.1962	11.1451	Pian di Feccia	Adult	?	70	Yes	Open
Tawny owl	Strix aluco	Native	1	2011	October	30	43.2328	11.1751	Colonna di Montarrenti	Adult	?	70	Yes	Open
Tawny owl	Strix aluco	Native	1	2012	February	9	43.2392	11.2801	San Rocco a Pilli	Adult	?	50	No	Open
Tawny owl	Strix aluco	Native	1	2012	March	1	43.0803	11.0194	Il Gabellino	Adult	?	50	Yes	Open
Tawny owl	Strix aluco	Native	1	2012	March	15	43.0683	11.0188	Le Fornaci	Adult	?	50	No	Ecotone
Tawny owl	Strix aluco	Native	1	2013	February	1	43.0878	11.029	La Madonnina di Boccheggiano	Adult	?	50	No	Closed
Tawny owl	Strix aluco	Native	1	2013	March	16	43.0803	11.0194	Il Gabellino	Adult	?	50	Yes	Open
Tawny owl	Strix aluco	Native	1	2013	March	23	43.114	11.0498	Ponte della Balestrina	Adult	?	70	No	Closed
European starling	Sturnus vulgaris	Native	1	2013	June	26	43.0683	11.0188	Le Fornaci	Adult	-	50	No	Ecotone
Wild boar	Sus scrofa	Native	1	2011	February	17	43.129	11.0766	Le Vene	Adult	M	90	No	Closed
Wild boar	Sus scrofa	Native	1	2011	February	4	43.0773	11.0078	Petriccio	Adult	M	50	No	Closed
Wild boar	Sus scrofa	Native	1	2011	July	13	43.0686	11.0195	Ponte della Balia	Adult	F	70	No	Closed
Wild boar	Sus scrofa	Native	1	2011	November	10	43.0755	11.0006	Ricavolo	Juvenile	F	70	No	Closed
Wild boar	Sus scrofa	Native	1	2013	August	16	43.0755	10.9963	Curva del Civilini	Juvenile	M	70	No	Ecotone (hedgerows)
Wild boar	Sus scrofa	Native	1	2013	August	2	43.0759	10.9916	Font'Aquila	Juvenile	-	70	No	Closed
Wild boar	Sus scrofa	Native	1	2013	August	16	43.0803	11.0194	Il Gabellino	Adult	M	50	Yes	Open
Wild boar	Sus scrofa	Native	1	2013	February	8	43.0827	10.9748	Botro ai Ponti	Juvenile	M	50	No	Ecotone
Wild boar	Sus scrofa	Native	1	2013	July	31	43.0427	11.0489	Fosso di Tamabrillo	Juvenile	M	70	No	Closed
Wild boar	Sus scrofa	Native	1	2013	May	31	43.0803	11.0194	Il Gabellino	Juvenile	M	50	Yes	Open
Common whitethroat	Sylvia communis	Native	1	2013	April	16	43.0799	11.0192	Il Gabellino	Adult	-	50	Yes	Open
Moltoni's warbler	Sylvia subalpina	Native	1	2013	August	30	43.079	10.9871	Il Camparello	Adult	M	50	No	Urban
Eurasian wren	Troglodytes troglodytes	Native	1	2013	July	31	43.129	11.0766	Le Vene	Adult	-	90	No	Closed
European blackbird	Turdus merula	Native	1	2012	December	18	42.9892	11.071	Montemassi	Adult	M	50	No	Urban
European blackbird	Turdus merula	Native	1	2013	April	9	43.0799	11.0192	Il Gabellino	Adult	M	50	Yes	Open
European blackbird	Turdus merula	Native	1	2013	August	9	43.0827	10.9748	Botro ai Ponti	Adult	F	50	No	Ecotone
European blackbird	Turdus merula	Native	1	2013	July	31	43.0605	11.019	Gabbiano	Adult	M	70	No	Ecotone
European blackbird	Turdus merula	Native	1	2013	July	17	43.129	11.0766	L'Apparita	-	-	70	No	Closed
European blackbird	Turdus merula	Native	1	2013	July	17	43.0324	11.0646	Meleta	Adult	M	90	No	Closed
European blackbird	Turdus merula	Native	1	2013	July	17	42.9323	11.082	Monte Lattaia	Juvenile	-	90	No	Open
European blackbird	Turdus merula	Native	1	2013	July	3	43.25	11.2243	Rosia	Adult	M	50	No	Urban
European blackbird	Turdus merula	Native	1	2013	May	10	43.2035	11.1485	Castello di Frosini	Adult	M	50	Yes	Urban
European blackbird	Turdus merula	Native	1	2013	September	17	43.0578	11.0249	I Canapai	Adult	F	90	No	Ecotone
Song thrush	Turdus philomelos	Native	1	2013	August	9	43.0833	11.0255	Sbarra di Forcoli	Adult	-	70	No	Closed
Barn owl	Tyto alba	Native	1	2012	April	21	43.0617	11.0179	I Canapai	Adult	?	90	No	Ecotone
Barn owl	Tyto alba	Native	1	2012	November	6	43.1426	11.1175	Il Palazzetto	Adult	?	70	Yes	Urban
Barn owl	Tyto alba	Native	1	2013	May	24	43.2485	11.2947	Fogliano - San Rocco a Pilli	Adult	-	110	No	Open
Barn owl	Tyto alba	Native	1	2013	May	3	42.8334	11.0837	Superstrada di Grosseto	Adult	-	110	No	Open
Hoopoe	Upupa epops	Native	1	2012	April	7	43.0771	11.0071	Petriccio	Adult	?	50	No	Closed
Asp viper	Vipera aspis	Native	1	2012	July	13	43.0324	11.0646	Meleta	Adult	F	90	No	Closed
Asp viper	Vipera aspis	Native	1	2012	June	16	43.0824	10.9835	Via Basilicata - Prata	Adult	F	50	No	Urban
Asp viper	Vipera aspis	Native	1	2013	April	3	43.0755	10.9963	Curva del Civilini	Adult	-	70	No	Ecotone (hedgerows)
Asp viper	Vipera aspis	Native	1	2013	April	3	43.0863	10.9789	La Pilina	Adult	-	70	No	Closed
Asp viper	Vipera aspis	Native	1	2013	August	30	43.0863	10.9789	La Pilina	Adult	-	70	No	Closed
Asp viper	Vipera aspis	Native	1	2013	June	5	43.2328	11.1751	Colonna di Montarrenti	Adult	-	70	Yes	Open
Asp viper	Vipera aspis	Native	1	2013	June	19	43.0855	10.9838	Ispanto - Prata	-	-	50	No	Urban
Red fox	Vulpes vulpes	Native	2	2011	April	14	42.8334	11.0837	Superstrada di Grosseto	Adult + Juvenile	?	110	No	Open
Red fox	Vulpes vulpes	Native	1	2011	August	11	43.2197	11.2734	Bivio di Rosia	Adult	?	70	No	Ecotone
Red fox	Vulpes vulpes	Native	1	2011	February	17	42.9913	11.0686	Montemassi	Juvenile	F	50	No	Urban
Red fox	Vulpes vulpes	Native	1	2011	July	13	43.079	10.9871	Il Camparello	Juvenile	M	50	No	Urban
Red fox	Vulpes vulpes	Native	1	2011	July	6	43.2807	11.2607	Pian dei Mori	Adult	F	60	Yes	Open/Anthropized
Red fox	Vulpes vulpes	Native	1	2011	July	26	43.0755	11.0006	Ricavolo	Adult	M	70	No	Closed
Red fox	Vulpes vulpes	Native	1	2011	November	3	43.0804	11.0195	Il Gabellino	Juvenile	?	70	Yes	Open
Red fox	Vulpes vulpes	Native	1	2012	August	30	43.0844	11.028	Le 4 strade di Boccheggiano	Juvenile	M	70	No	Closed
Red fox	Vulpes vulpes	Native	1	2012	February	9	43.2624	11.2312	Malignano	Adult	F	90	No	Open
Red fox	Vulpes vulpes	Native	1	2012	January	24	43.0844	11.028	Le 4 strade di Boccheggiano	Juvenile	M	70	No	Closed
Red fox	Vulpes vulpes	Native	1	2013	April	23	43.1962	11.1451	Pian di Feccia	Adult	-	70	Yes	Open
Red fox	Vulpes vulpes	Native	1	2013	August	9	43.0803	11.0194	Il Gabellino	Adult	F	50	Yes	Open
Red fox	Vulpes vulpes	Native	1	2013	August	16	43.0803	11.0194	Il Gabellino	Adult	F	50	Yes	Open
Red fox	Vulpes vulpes	Native	1	2013	August	23	43.2338	11.2769	Vicino uscita San Rocco	Juvenile	-	110	No	Open
Red fox	Vulpes vulpes	Native	1	2013	December	11	43.0803	11.0194	Il Gabellino	Adult	M	70	Yes	Open
Red fox	Vulpes vulpes	Native	1	2013	February	8	43.2035	11.1485	Castello di Frosini	Adult	?	50	Yes	Urban
Red fox	Vulpes vulpes	Native	1	2013	February	22	43.2624	11.2312	Malignano	Adult	F	90	No	Open
Red fox	Vulpes vulpes	Native	1	2013	January	24	43.2982	11.3089	Bivio di Terensano	Adult	M	50	No	Urban
Red fox	Vulpes vulpes	Native	1	2013	January	24	43.0826	10.9755	Ponte di Prata	Adult	F	90	Yes	Urban
Red fox	Vulpes vulpes	Native	1	2013	July	24	42.7841	11.0911	Via Aurelia Nord - Grosseto	Adult	-	110	No	Open
Red fox	Vulpes vulpes	Native	1	2013	June	26	43.1046	11.035	Ponte di Montieri	Adult	F	70	Yes	Closed
Red fox	Vulpes vulpes	Native	1	2013	March	8	43.2197	11.2734	Bivio di Rosia	Adult	?	70	No	Ecotone
Red fox	Vulpes vulpes	Native	1	2013	March	2	43.2392	11.2801	San Rocco a Pilli	Adult	?	50	No	Open
Red fox	Vulpes vulpes	Native	1	2013	May	24	43.2813	11.2616	Bivio di Barontoli	Adult	-	90	No	Open
Red fox	Vulpes vulpes	Native	1	2013	May	17	43.2197	11.2734	Bivio di Rosia	Adult	-	70	No	Ecotone
Red fox	Vulpes vulpes	Native	1	2013	May	31	43.2485	11.2947	Fogliano - San Rocco a Pilli	Adult	M	110	No	Open
Red fox	Vulpes vulpes	Native	1	2013	May	3	42.8334	11.0837	Superstrada di Grosseto	Adult	-	110	No	Open
Red fox	Vulpes vulpes	Native	1	2013	November	20	43.114	11.0498	Ponte della Balestrina	Adult	-	70	No	Closed
Red fox	Vulpes vulpes	Native	1	2013	October	2	43.2165	11.1552	Montebello	Adult	M	90	No	Open
Red fox	Vulpes vulpes	Native	1	2013	September	26	43.0749	10.9991	Braccio di Tatti	Juvenile	M	70	No	Ecotone (hedgerows)
Red fox	Vulpes vulpes	Native	1	2013	September	17	42.8324	11.0829	Dopo sottopasso Bivio Sbirro	Juvenile	M	90	No	Open
Red fox	Vulpes vulpes	Native	1	2013	September	4	42.9016	11.0696	Fra Braccagni e Monte Lattaia	Adult	M	90	No	Open
Red fox	Vulpes vulpes	Native	1	2013	September	17	43.0803	11.0194	Il Gabellino	Adult	F	50	Yes	Open
Red fox	Vulpes vulpes	Native	1	2013	September	4	42.834	11.0842	Prima sottopasso Bivio Sbirro	Adult	F	70	No	Open
Red fox	Vulpes vulpes	Native	1	2013	September	17	43.0292	11.0631	Sotto Meleta	Adult	F	50	No	Closed
Aesculapian snake	Zamenis longissimus	Native	1	2012	June	30	43.0826	10.9836	Via Basilicata - Prata	Juvenile	?	50	No	Urban
Aesculapian snake	Zamenis longissimus	Native	1	2012	May	25	43.0826	10.9836	Via Basilicata - Prata	Juvenile	?	50	No	Urban
Aesculapian snake	Zamenis longissimus	Native	1	2012	October	21	43.0833	10.9759	La Pilina	Adult	M	70	No	Closed
Aesculapian snake	Zamenis longissimus	Native	1	2013	July	31	43.0749	10.9991	Braccio di Tatti	Adult	-	70	No	Ecotone (hedgerows)
Aesculapian snake	Zamenis longissimus	Native	1	2013	July	10	43.0427	11.0489	Fosso di Tamabrillo	Adult	F	70	No	Closed
Aesculapian snake	Zamenis longissimus	Native	1	2013	July	24	43.0324	11.0646	Meleta	Adult	-	90	No	Closed
Aesculapian snake	Zamenis longissimus	Native	1	2013	June	19	43.0865	11.0325	Campo sportivo Boccheggiano	Adult	-	70	No	Closed
Aesculapian snake	Zamenis longissimus	Native	1	2013	May	10	43.0878	11.029	La Madonnina di Boccheggiano	Adult	M	50	No	Closed
Aesculapian snake	Zamenis longissimus	Native	1	2013	May	31	43.25	11.2243	Rosia	Adult	-	50	No	Urban

## Sheet: Foglio1
Aliens on the road: surveying wildlife road-kills for assessing the risk of biological invasion
Andrea Viviano, Marcello D’Amico, and Emiliano Mori
Supplementary Material S1
List and amount of road-killed species in our fieldwork survey
Species	Road-kills	Road-kill rates
Erinaceus europaeus	73	0.722772
Meles meles	37	0.366337
Vulpes vulpes	35	0.346535
Bufo bufo	31	0.306931
Hystrix cristata	27	0.267327
Martes martes	17	0.168317
Sciurus vulgaris	15	0.148515
Garrulus glandarius	13	0.128713
Phasianus colchicus	12	0.118812
Sus scrofa	10	0.0990099
Lepus europaeus	10	0.0990099
Felis catus	10	0.0990099
Turdus merula	10	0.0990099
Mustela putorius	9	0.0891089
Apus apus	9	0.0891089
Lacerta bilineata	9	0.0891089
Zamenis longissimus	9	0.0891089
Rana dalmatina	9	0.0891089
Strix aluco	8	0.0792079
Hierophis virdiflavus	8	0.0792079
Capreolus capreolus	7	0.0693069
Podarcis sp.	7	0.0693069
Vipera aspis	7	0.0693069
Martes foina	6	0.0594059
Bufotes viridis balearicus	6	0.0594059
Myocastor coypus	5	0.049505
Columba livia	5	0.049505
Alectoris rufa	4	0.039604
Streptopelia decaocto	4	0.039604
Athene noctua	4	0.039604
Tyto alba	4	0.039604
Delichon urbicum	4	0.039604
Podarcis muralis	4	0.039604
Myodes glareolus	3	0.029703
Caprimulgus europaeus	3	0.029703
Emberiza calandra	3	0.029703
Erithacus rubecula	3	0.029703
Passer italiae	3	0.029703
Pica pica	3	0.029703
Chalcides chalcides	3	0.029703
Podarcis siculus	3	0.029703
Rattus rattus	2	0.019802
Buteo buteo	2	0.019802
Merops apiaster	2	0.019802
Bubulcus ibis	2	0.019802
Cyanistes caeruleus	2	0.019802
Emberiza cirlus	2	0.019802
Fringilla coelebs	2	0.019802
Hirundo rustica	2	0.019802
Lullula arborea	2	0.019802
Mauremys leprosa	2	0.019802
Pelophylaxsp.	2	0.019802
Dama dama	1	0.00990099
Hypsugo savii	1	0.00990099
Plecotus sp.	1	0.00990099
Apodemus flavicollis	1	0.00990099
Apodemussp.	1	0.00990099
Microtus savii	1	0.00990099
Mustela nivalis	1	0.00990099
Perdix perdix	1	0.00990099
Streptopelia turtur	1	0.00990099
Asio otus	1	0.00990099
Otus scops	1	0.00990099
Circaetus gallicus	1	0.00990099
Circus cyaneus	1	0.00990099
Falco columbarius	1	0.00990099
Falco peregrinus	1	0.00990099
Falco subbuteo	1	0.00990099
Upupa epops	1	0.00990099
Egretta garzetta	1	0.00990099
Dendrocopos major	1	0.00990099
Picus viridis	1	0.00990099
Calandrella brachydactyla	1	0.00990099
Galerida cristata	1	0.00990099
Coccothraustes coccothraustes	1	0.00990099
Corvus cornix	1	0.00990099
Luscinia megarhynchos	1	0.00990099
Monticola solitarius	1	0.00990099
Muscicapa striata	1	0.00990099
Passer montanus	1	0.00990099
Prunella modularis	1	0.00990099
Saxicola rubicola	1	0.00990099
Serinus serinus	1	0.00990099
Sturnus vulgaris	1	0.00990099
Sylvia communis	1	0.00990099
Sylvia subalpina	1	0.00990099
Troglodytes troglodytes	1	0.00990099
Turdus philomelos	1	0.00990099
Anguis veronensis	1	0.00990099
