# Supplementary material for: Aliens on the Road: Surveying Wildlife Roadkill to Assess the Risk of Biological Invasion
Source: Biology (Basel). 2023 Jun 13;12(6):850. doi: 10.3390/biology12060850 (PMC10294960; doi:10.3390/biology12060850)
Supplement: Supplementary file 1 [file biology-12-00850-s001.zip › SupplementaryMaterialS2.xls]

## Sheet: savedrecs
Aliens on the road: surveying wildlife road-kills for assessing the risk of biological invasion
Andrea Viviano, Marcello D’Amico, and Emiliano Mori
Supplementary Material S2
List of retained studies from the literature review, and related variables
Authors	StudyID	Country	Biome	Latitude	PIL	NeighboringCountries	NativeRoadkilleSpeciesPercentage	IntroducedRoadkilledSpeciesPercentage	DomesticRoadkilledSpeciesPercentage	PaleointroducedRoadkilledSpeciesPercentage	RecentlyIntroducedRoadkilledSpeciesPercentage	SurveyedKm	IntroducedRoadkilledSpeciesPercentageRates	IntroducedSpeciesPercentage
Akrimetal	1	Pakistan	Desert	33.4986	348	5	100	0	0	0	0	16032	0	0.58
Alvesetal	2	Brazil	Tropical	-21.965	1609	10	96.3	3.7	0	0	3.7	10563	0.000350279	1.04
Ascensaoetal	3	Brazil	Tropical	-19.6289	1609	10	97.6	2.4	0.8	0	1.6	84673	2.83443e-05	1.04
AshleyRobinson	4	Canada	Temperate	43	1988	1	94	6	3	0	3	3078	0.00194932	1.94
Brockieetal	5	NewZealand	Temperate	-39	250	0	43.49	56.51	17.39	8.69	30.43	10478	0.0053932	15.5
Canaletal	6	Spain	Mediterranean	37.0694	1427	3	94.12	5.88	2.94	1.96	0.98	87000	6.75862e-05	16.82
Clevengeretal	7	Canada	Temperate	52	1988	1	100	0	0	0	0	65253	0	1.94
Coelhoetal	8	Brazil	Tropical	-22	1609	10	100	0	0	0	0	1110	0	1.04
Collinsonetal	9	South Africa	Tropical	-22.228	419	6	98.1481	1.85185	1.23457	0	0.617284	14400	0.000128601	9.11
Cuyckensetal	10	Argentina	Temperate	-23	487	5	82.15	17.85	17.85	0	0	5610	0.00318182	1.71
DAmicoetal	11	Spain	Mediterranean	37.0218	1427	3	90.7692	9.23077	4.61538	4.61538	0	10658	0.000866088	16.82
daSilvaBrazetal	12	Brazil	Tropical	-14	1609	10	100	0	0	0	0	5720	0	1.04
DelgadoTrejoetal	13	Mexico	Tropical	18.3623	1273	6	100	0	0	0	0	2100	0	1.69
DhiabSelmi	14	Tunisia	Mediterranean	35.9378	47	2	80	20	16	4	0	1612	0.0124069	3.48
Galvez	15	Panama	Tropical	8.91948	64	2	95.2381	4.7619	4.7619	0	0	3256	0.0014625	0.07
Garrigaetal	16	Spain	Mediterranean	41.3969	1427	3	91.7647	8.23529	3.52941	3.52941	1.17647	16589	0.000496431	16.82
Glistaetal	17	USA	Temperate	40	23320	4	91.3	8.7	2.9	0	5.8	1488	0.00584677	5.87
GonzalezGallinaetal	18	Mexico	Tropical	19.5713	1273	6	93.1034	6.89655	5.17241	0	1.72414	3808	0.00181107	1.69
HobdayMinstrel	19	Australia	Tropical	-42	1553	0	81.5	18.5	5.6	0	12.9	15281	0.00121065	2.22
Huietal	20	Malaysia	Tropical	5.94169	373	2	100	0	0	0	0	48	0	1.52
Kiokoetal	21	Tanzania	Tropical	-1.4509	68	8	94.7368	5.26316	5.26316	0	0	750	0.00701754	0.39
Kirosetal	22	Ethiopia	Tropical	13.7441	111	7	100	0	0	0	0	8480	0	0.32
Lalaetal	23	Kenya	Tropical	-2.96413	110	4	100	0	0	0	0	13008	0	0.53
Leeetal	24	South Korea	Temperate	37.1546	1811	1	84.6	15.4	15.4	0	0	12322	0.0012498	1.52
Lyamuyaetal	25	Tanzania	Tropical	-2.03892	68	8	100	0	0	0	0	2000	0	0.39
Machadoetal	26	Brazil	Tropical	-9.68291	1609	10	88.2353	11.7647	11.7647	0	0	4766	0.00246847	1.04
Mirandaetal	27	Brazil	Tropical	-18.7808	1609	10	97.7011	2.29885	1.14943	0	1.14943	9624	0.000238866	1.04
Nyirendaetal	28	Zambia	Tropical	-14.5001	22	8	100	0	0	0	0	8956	0	0.39
Rendalletal	29	Australia	Tropical	-38	1553	0	80.6452	19.3548	3.22581	3.22581	12.9032	14076	0.00137502	2.22
Santosetal	30	Brazil	Tropical	-15.2955	1609	10	100	0	0	0	0	10856	0	1.04
Santosetal	31	Portugal	Mediterranean	38.3017	254	1	93.3962	6.60377	1.88679	3.77358	0.943396	8986	0.000734896	12.93
SeibertConover	32	USA	Temperate	39	23320	5	89.3	10.7	3.6	0	7.1	80	0.13375	5.87
Seoetal	33	South Korea	Temperate	37.1546	1811	1	94.0594	5.94059	4.9505	0	0.990099	16856	0.000352432	1.52
Silvaetal	34	Thailand	Tropical	14.3892	506	5	95.9677	4.03226	4.03226	0	0	9112	0.000442522	0.76
Slater	35	UK	Temperate	40	3131	0	86.1	13.9	4.7	6.9	2.3	1360	0.0102206	5.27
Tiedemanetal	36	USA	Desert	35.7596	23320	4	96.837	3.16302	0.973236	0	2.18978	14589	0.000216808	5.87
Valerioetal	37	Italy	Mediterranean	40.9751	2108	6	93.94	6.06	0	3.03	3.03	13600	0.000445588	7.21
Vanceetal	38	USA	Temperate	37.142	23320	6	95.3846	4.61538	3.07692	0	1.53846	15022	0.000307242	5.87
Vivianoetal	39	Italy	Mediterranean	42.1329	2108	6	88.76	11.24	2.25	3.37	5.62	15842	0.000709506	7.21
Wangetal	40	China	Temperate	41.9487	17730	14	96.8254	3.1746	1.5873	0	1.5873	7151	0.000443938	0.45
WilsonCraig	41	Canada	Temperate	42	1988	1	93.02	6.98	0	0	6.98	168	0.0415476	1.94

## Sheet: Foglio1
COUNTRY	N Species	N roadkills	SPECIES				INDIVIDUALS
			Native%	Domestic%	Paleointroduced%	Recently introduced%	Native%	Domestic%	Paleointroduced%	Recently introduced%
Pakistan	18	131	100	0	0	0	100	0	0	0
Spain	102	1535	94.12	2.94	1.96	0.98	87.2313	5.01629	1.04235	6.7101
South Africa	162	991	98.1481	1.23457	0	0.617284	99.6973	0.201816	0	0.100908
Argentina	28	293	82.15	17.85	0	0	76.7918	23.2082	0	0
Brazil	138	824	100	0	0	0	100	0	0	0
Spain	65	2368	90.7692	4.61538	4.61538	0	99.3666	0.422297	0.211149	0
Mexico	38	314	100	0	0	0	100	0	0	0
Spain	85	2013	91.7647	3.52941	3.52941	1.17647	96.3736	3.12966	0.447094	0.0496771
Mexico	58	946	93.1034	5.17241	0	1.72414	99.26	0.634249	0	0.105708
Tanzania	38	101	94.7368	5.26316	0	0	97.0297	2.9703	0	0
Ethiopia	20	143	100	0	0	0	100	0	0	0
Brazil	17	NA	88.2353	11.7647	0	0	NA	NA	NA	NA
Brazil	87	113	97.7011	1.14943	0	1.14943	98.2301	0.884956	0	0.884956
Zambia	28	200	100	0	0	0	100	0	0	0
Brazil	158	4422	100	0	0	0	100	0	0	0
Portugal	106	4427	93.3962	1.88679	3.77358	0.943396	97.9896	1.12943	0.406596	0.474362
South Korea	101	5044	94.0594	4.9505	0	0.990099	95.0238	4.659	0	0.317209
Thailand	188	1583	95.9677	4.03226	0	0	88.1238	11.8762	0	0
California	411	36335	96.837	0.973236	0	2.18978	97.9772	1.31829	0	0.704555
Virginia	65	1837	95.3846	3.07692	0	1.53846	93.0866	6.58683	0	0.326619
China	63	3475	96.8254	1.5873	0	1.5873	98.964	0.028777	0	1.00719
Italy	89	511	88.76	2.25	3.37	5.62	85.91	2.94	8.02	3.13
Tunisia	25	480	80	16	4	0	80.63	16.88	2.5	0
Tropical areas	2485	139602	100	0	0	0	100	0	0	0
Italy	33	529	93.94	0	3.03	3.03	99.62	0	0.19	0.19
Australia	62	1402	80.6452	3.22581	3.22581	12.9032	36.234	2.85307	0.927247	59.9857
Panama	21	79	95.2381	4.7619	0	0	98.7342	1.26582	0	0
Kenya	20	1436	100	0	0	0	100	0	0	0
Tanzania	26	51	100	0	0	0	100	0	0	0
Brazil	125	10942	97.6	0.8	0	1.6	99.8721	0.0091391	0	0.118808
Brazil	27	80	96.3	0	0	3.7	98.75	0	0	1.25
Malaysia	24	305	100	0	0	0	100	0	0	0
